# Supplementary figures and images for: Facile assembly of BiOI/GO composites with enhanced photocatalytic activity for NO photooxidation under visible light irradiation
Source: Royal Society of Chemistry journal article supplement (doi:10.1039/d3nj05646e), 2024-01-01

### Supplementary Figure 1

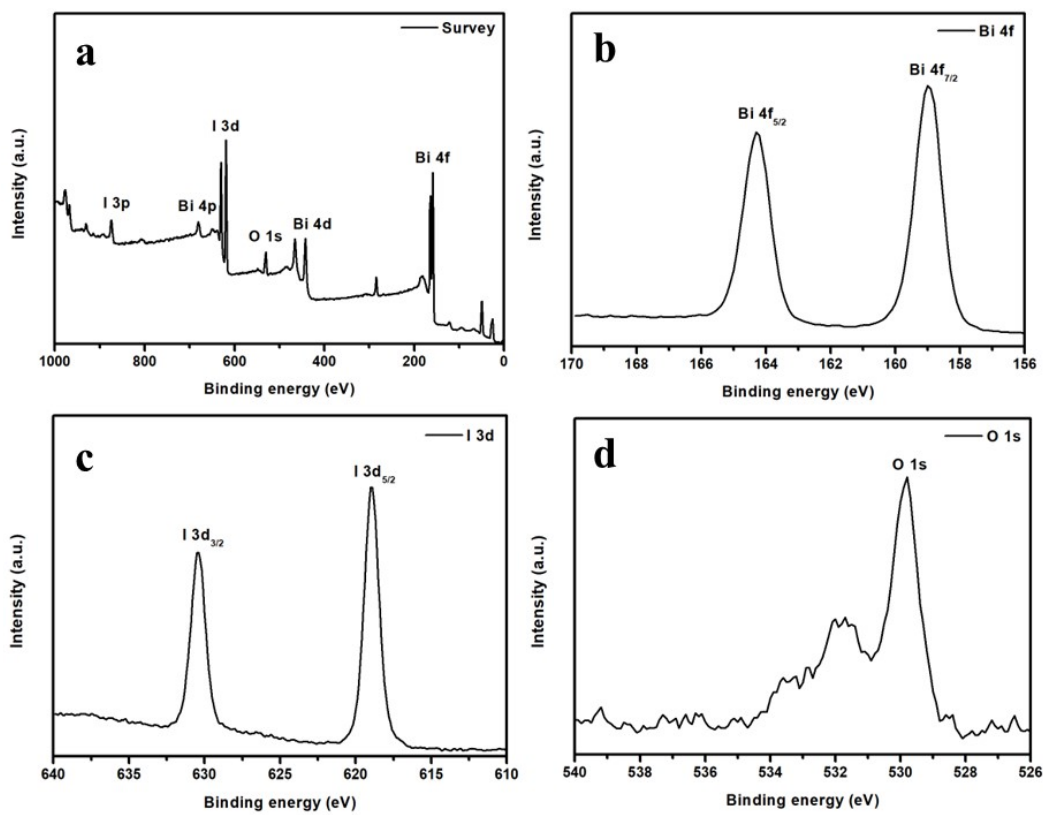

Supplement: d3nj05646e1.pdf [file d3nj05646e1.pdf]

### Supplementary Figure 2

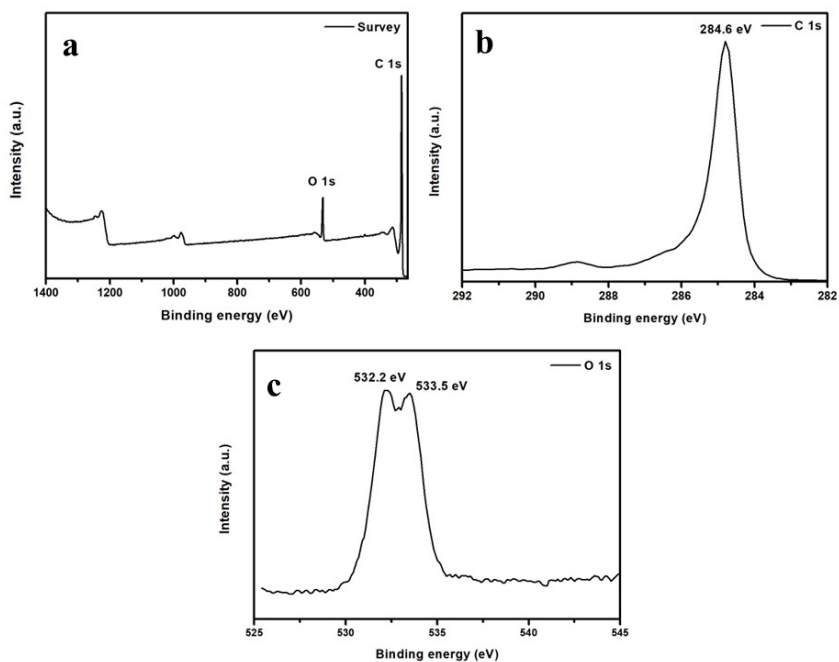

Supplement: d3nj05646e2.pdf [file d3nj05646e2.pdf]
